# Supplementary material for: Mixed valence trimers in cation radical salts of TMTTF with the planar bis(6-sulfo-8-quinolato) platinum complex [Pt(qS)2]2−
Source: Royal Society of Chemistry journal article supplement (doi:10.1039/d0nj03584j), 2020-01-01
Supplement: d0nj03584j1.pdf [file d0nj03584j1.pdf]

New Journal of Chemistry

ELECTRONIC SUPPLEMENTARY INFORMATION

Mixed valence trimers in cation radical salts of TMTTF with the planar bis(6-sulfo-8-quinolato) platinum complex  $[\text{Pt}(\text{qS})_2]^{2-}$

Arkadiusz Frackowiak,<sup>a,b</sup> Bolesław Barszcz,<sup>a</sup> Iwona Olejniczak,<sup>a</sup> Mikołaj Tomasik<sup>a</sup>, Natalia Jarzyniak<sup>a</sup>, Roman Świetlik,<sup>\*,a</sup> Pascale Auban-Senzier,<sup>b</sup> Marc Fourmigué,<sup>c</sup> Olivier Jeannin,<sup>c</sup> and Franck Camerel<sup>\*,c</sup>

<sup>a</sup> Institute of Molecular Physics, Polish Academy of Sciences, ul. Mariana Smoluchowskiego 17, 60-179 Poznań, Poland.

<sup>b</sup> Laboratoire de Physique des Solides, Université Paris-Sud, UMR CNRS 8502, Bât. 510, 91405 Orsay, France.

<sup>c</sup> Univ Rennes, CNRS, ISCR (Institut des Sciences Chimiques de Rennes) - UMR 6226, 35000 Rennes, France.

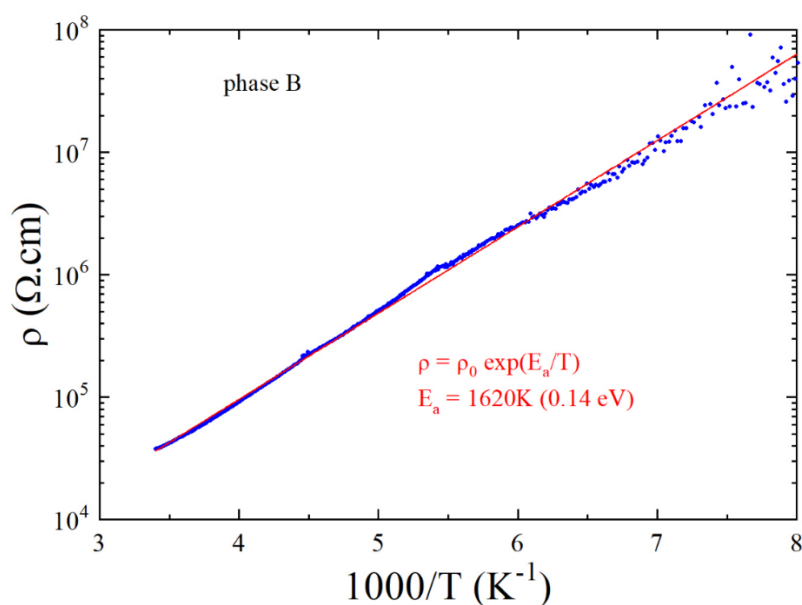

**Figure S1.** Electrical resistivity  $\rho$  plotted as  $\log \rho$  versus the inverse temperature for the B phase  $(\text{TMTTF})_3[\text{Pt}(\text{qS})_2]$ . The red line is the fit to the data with the law  $\rho = \rho_0 \exp(E_a/T)$  giving the activation energy  $E_a = 1620$  K.

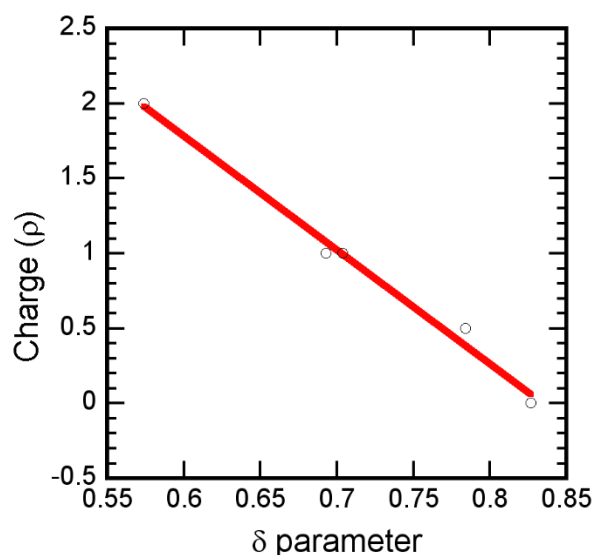

**Figure S2.** Linear relationship between the structural parameter  $\delta$  (see text) and the charge  $\rho$  of the TMTTF molecule, established from reported structures (Cf Table 2) without ambiguity on the charge.

### Infrared and Raman spectra of $[\text{Pt}(\text{qS})_2]^{2-}$ anion

Room temperature Raman and IR spectra of  $[\text{Pt}(\text{qS})_2]\text{K}_2$  and  $[\text{Pt}(\text{qS})_2]\text{Na}_2$  powders are displayed in Figure S3 and Figure S4, respectively. As could be expected, there is nearly no difference between vibrational bands of both compounds. The most important vibrational features of  $[\text{Pt}(\text{qS})_2]^{2-}$  anion, together with the results of numerical calculations of normal modes and proposed assignment, are collected in Table S1.

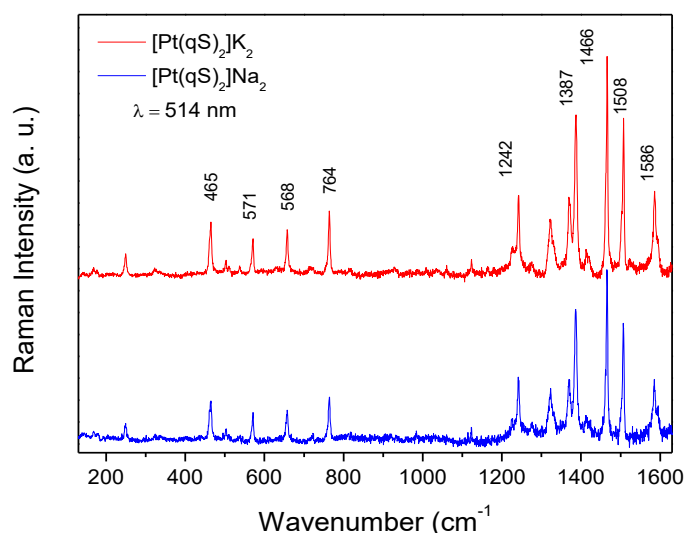

**Figure S3.** Raman spectra of the salts  $[\text{Pt}(\text{qS})_2]\text{K}_2$  and  $[\text{Pt}(\text{qS})_2]\text{Na}_2$  (excit.  $\lambda = 514.5$  nm).

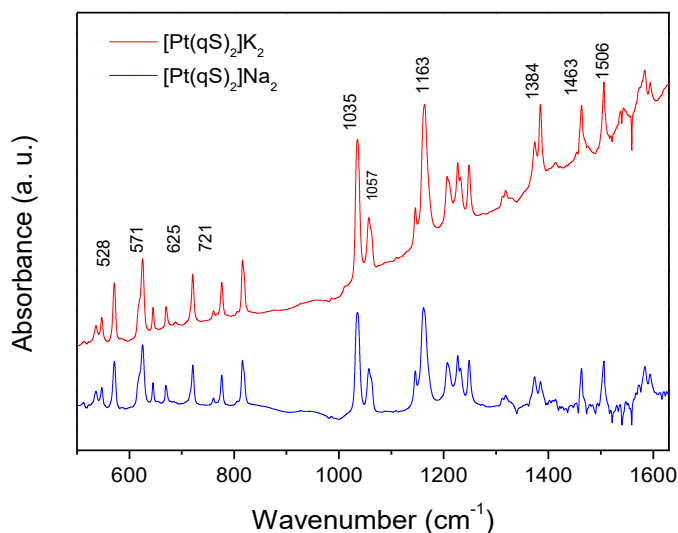

**Figure S4.** Infrared spectra of the salts  $[\text{Pt}(\text{qS})_2]\text{K}_2$  and  $[\text{Pt}(\text{qS})_2]\text{Na}_2$ .

**Table S1.** Vibrational spectra of  $[\text{Pt}(\text{qS})_2]^{2-}$  anion.

| Experiment                                     |                            | Theory                          | Assignment*                  |
|------------------------------------------------|----------------------------|---------------------------------|------------------------------|
| $[\text{Pt}(\text{qS})_2]\text{X}_2$ (X=Na, K) |                            | $[\text{Pt}(\text{qS})_2]^{2-}$ |                              |
| Raman<br>( $\text{cm}^{-1}$ )                  | IR<br>( $\text{cm}^{-1}$ ) | ( $\text{cm}^{-1}$ )            |                              |
| 1586                                           | -                          | 1623                            | CCs+CNs+COs+CCHb             |
| 1508                                           | 1506                       | 1534                            | CCs+CCHb+CNs+COs « s »       |
| -                                              | -                          | 1533                            | CCs+CCHb+CNs+COs « as »      |
| 1466                                           | -                          | 1485                            | CCHb+CCs+CNs+COs « s »       |
| -                                              | 1463                       | 1482                            | CCHb+CCs+CNs+COs « as »      |
| 1387                                           | -                          | 1445                            | CCs+CCHb                     |
| -                                              | 1384                       | 1410 ?                          | HCNb+CCs                     |
| -                                              | 1374                       | -                               |                              |
| 1370                                           | -                          | 1426                            | CCHb+CNs+CCs                 |
| 1323                                           | -                          | 1350                            | CNs+CCs+CCHb « s »           |
| -                                              | 1318                       | 1350                            | CNs+CCs+CCHb « as »          |
| -                                              | 1248                       | 1297                            | COs+CCHb+CCCb                |
| 1242                                           | -                          | 1270                            | CCHb+CNs « s »               |
| -                                              | 1227                       | 1265                            | CCHb+CNs « as »              |
| -                                              | 1163                       | 1154 ?                          | CCHb                         |
| -                                              | 1146                       | -                               |                              |
| -                                              | 1057                       | ?                               |                              |
| -                                              | 1035                       | ?                               |                              |
| -                                              | 816                        | 886                             | SOs+CHb oop+CCCb oop         |
| -                                              | 777                        | 828                             | CCCb (in-plane rings def)    |
| 764                                            | -                          | 763                             | CCCb+PtOs+PtNs+CNCb          |
| -                                              | 721                        | 734                             | SOs+CCCb                     |
| 658                                            | -                          | 671                             | PtNs+CCCb+CNCb+PtOs          |
| -                                              | 670                        | 685                             | NptNb oop+rings def oop      |
| -                                              | 645                        | 671                             | PtOs+PtNs+in-plane rings def |
| -                                              | 625                        | 652                             | PtOs+CCOb                    |
| 571                                            | -                          | 558                             | breathing mode « s »         |

|     |     |     |                                        |
|-----|-----|-----|----------------------------------------|
| -   | 571 | 558 | breathing mode « as »                  |
| -   | 547 | ?   |                                        |
| -   | 536 | ?   |                                        |
| 503 | -   | 513 | CCCb                                   |
| 465 | -   | 460 | OSOb+NPtOb                             |
| -   | 471 | 468 | SO <sub>3</sub> umbrella mode+CCCb     |
| 249 | -   | 256 | SO <sub>3</sub> w/r+in-plane rings def |

\* s – stretching, b – bending, w – wagging, r – rocking, oop – out-of-plane, def – deformation, « s » - symmetric, « as » - antisymmetric

### Polarized IR reflectance of (TMTTF)<sub>3</sub>[Pt(qS)<sub>2</sub>]

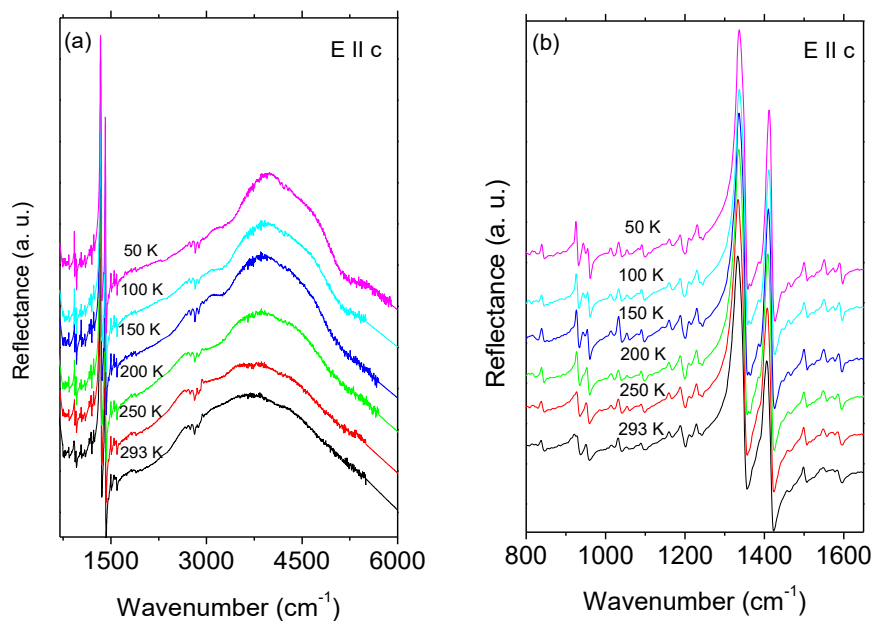

**Figure S5.** (a) Temperature dependence of the reflectance spectra of (TMTTF)<sub>3</sub>[Pt(qS)<sub>2</sub>]; (b) within the region of strong vibrational features (polarization  $E \parallel c$ ).

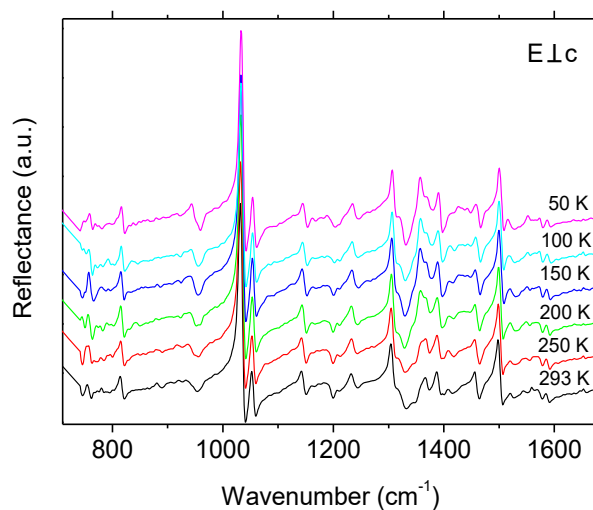

**Figure S6.** Temperature dependence of reflectance spectra of (TMTTF)<sub>3</sub>[Pt(qS)<sub>2</sub>] within the region of strong vibrational features (polarization  $E \perp c$ ).
